# Supplementary material for: Low-Temperature Vapor-Phase Synthesis of Single-Crystalline Gold Nanostructures: Toward Exceptional Electrocatalytic Activity for Methanol Oxidation Reaction
Source: MDPI journal article supplement (doi:10.3390/nano9040595), 2019-04-10
Supplement: s1 [file s1]

# Low-Temperature Vapor-Phase Synthesis of Single-Crystalline Gold Nanostructures: Toward Exceptional Electrocatalytic Activity for Methanol Oxidation Reaction

Siyeong Yang <sup>1</sup>, Kkotchorong Park <sup>1</sup>, Bongsoo Kim <sup>1,\*</sup> and Taejoon Kang <sup>2,3,\*</sup>

<sup>1</sup> Department of Chemistry, KAIST, Daejeon 34141, Korea; yy1633@kaist.ac.kr (S.Y.); smile\_cho@kaist.ac.kr (K.P.)

<sup>2</sup> Bionanotechnology Research Center, KRIBB, Daejeon 34141, Korea

<sup>3</sup> Department of Nanobiotechnology, KRIBB School of Biotechnology, UST, Daejeon 34113, Korea

\* Correspondence: kangtaejoon@kribb.re.kr (T.K.); bongsoo@kaist.ac.kr (B.K.)

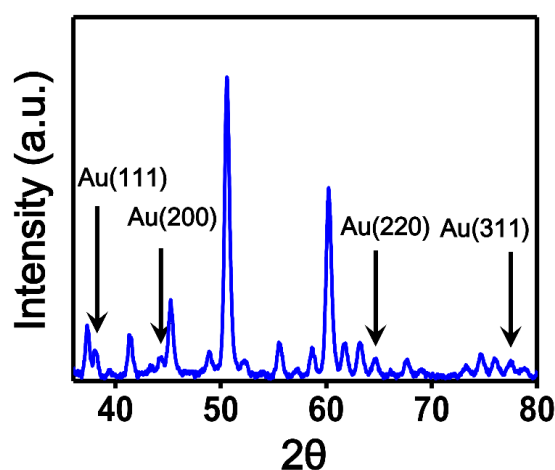

**Figure S1.** XRD spectrum of the Au NPs synthesized on an FTO substrate. The Au peaks are marked by arrows and the other peaks are signals related to the intrinsic substrate.

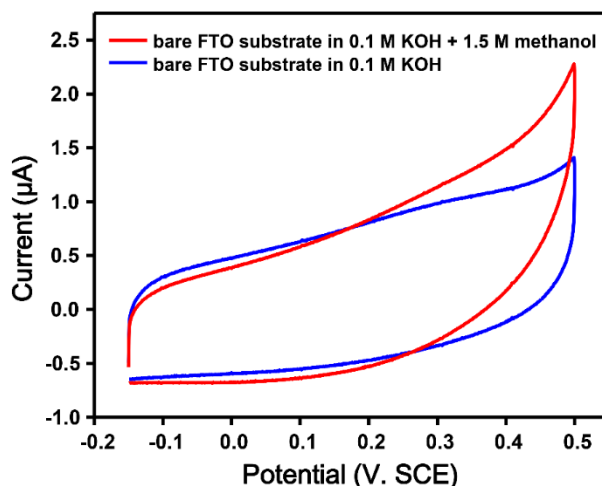

**Figure S2.** CV curves obtained with a bare FTO substrate in the absence (blue) and presence (red) of 1.5 M methanol in 0.1 M KOH (scan rate = 50 mV/s).

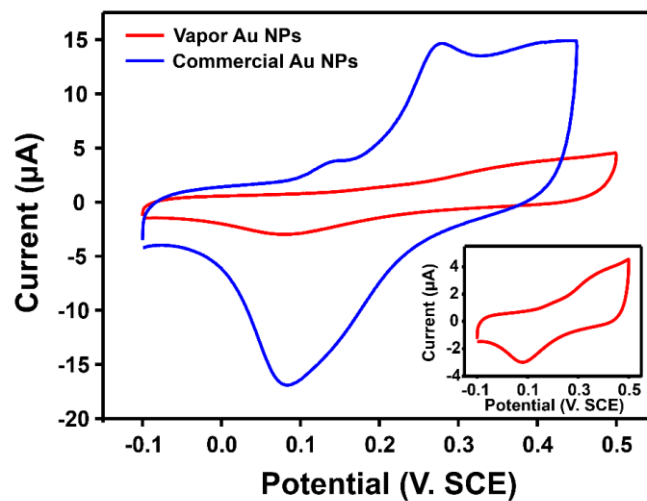

**Figure S3.** CV curves obtained with vapor-phase-grown Au NP electrodes (red) and commercial Au NP electrodes (blue) in a solution of 0.1 M KOH (scan rate = 50 mV/s). Inset is the magnified CV curve for the vapor-phase Au NPs. The electrochemical active surface area was calculated by integrating the consumed charge in the reduction curves.
